# Supplementary material
Source: publisher site journal article supplement (https://www.dovepress.com/article/578482)
Supplement: Supplementary file 1 [file 578482%20Revised%20Supplementary%20Materials.docx]

**Supplementary Materials**

Table S1 summarizes the heart rate variability (HRV) features analyzed in this study, including both time-domain and frequency-domain metrics. These indices were selected as commonly used markers of autonomic nervous system regulation and are known to be associated with sleep fragmentation, sympathetic activation, and obstructive sleep apnea manifestations.

Table S1. Heart Rate Variability (HRV) Features and Definitions

| Category | Variable | Units | Description |
| --- | --- | --- | --- |
| Time domain | NN | ms | Time interval between consecutive normal-to-normal heartbeats (RR intervals). |
| SDNN | ms | Standard deviation (SD) of NN intervals. |
| RMSSD | ms | Root mean square of successive NN interval differences. |
| pNN50 | % | Percentage of adjacent NN intervals that differ by more than 50 ms. |
| Frequency domain | nLF | % | Normalized low-frequency power (0.04–0.15 Hz). |
| nHF | % | Normalized high-frequency power (0.15–0.40 Hz). |
| LF/HF | - | Ratio of low-frequency to high-frequency power. |

Table S2 presents post-hoc effect sizes and statistical power for comparisons across pressure categories in older adults. Arousal events showed statistically significant differences across pressure categories (*p* < 0.01), with a large effect size (f=0.40) and high statistical power (0.92). Frequency-domain HRV metrics (nLF, nHF, and LF/HF ratio) were also significant (all *p* < 0.01) and showed high statistical power (0.99), despite a relatively small effect size (f=0.15). SDNN reached statistical significance (*p*=0.01), with a small effect size (f=0.06) and moderate statistical power (0.66). Regarding slow-wave characteristics, both the mean slope *p* < 0.01, f=0.39) and mean duration (*p* < 0.01, f=0.41) exhibited large effect sizes and strong statistical power (both > 0.80). The mean peak-to-peak (PTP) amplitude also reached statistical significance (*p*=0.03), accompanied by a moderate effect size (f=0.29) and moderate statistical power (0.56).

The post-hoc power analysis of younger adults is summarized in Table S3. Significant differences across pressure categories were observed for all HRV metrics (all *p* < 0.01). Both time-domain and frequency-domain features exhibited high statistical power (all > 0.9), supporting the robustness of the observed autonomic alterations despite small to moderate effect sizes (f range: 0.09–0.19). Among slow-wave characteristics, the mean PTP amplitude showed a significant difference across pressure categories (*p* < 0.01), with a large effect size (f=0.40) and strong statistical power (0.80).Collectively, these results indicated that the statistically significant findings observed across arousal events, HRV features, and slow-wave characteristics were supported by moderate to high statistical power, suggesting that these associations are unlikely to be attributable solely to the limited sample size. Nevertheless, given the exploratory and retrospective nature of the analyses, these results should be interpreted as supportive evidence of robustness rather than confirmatory proof, and further prospective studies are warranted.

Table S2. Post-Hoc Effect Size and Statistical Power for Pressure-Category Comparisons in the Elderly Group (*N*=20)

| Variable | *p* value | Cohen’s f | Statistical power |
| --- | --- | --- | --- |
| Sleep disorder indices b |  |  |  |
| Arousal events | < 0.01 | 0.40 | 0.92 |
| Apneic events | 0.84 | < 0.01 | < 0.1 |
| Hypopneic events | 0.06 | 0.21 | 0.41 |
| HRV features b |  |  |  |
| Time domain |  |  |  |
| SDNN (ms) | 0.01 | 0.06 | 0.66 |
| RMSSD (ms) | 0.78 | < 0.01 | < 0.1 |
| pNN50 (%) | 0.45 | < 0.01 | < 0.1 |
| Frequency domain |  |  |  |
| nLF (%) | < 0.01 | 0.15 | 0.99 |
| nHF (%) | < 0.01 | 0.15 | 0.99 |
| LF/HF | < 0.01 | 0.15 | 0.99 |
| Slow-wave characteristics |  |  |  |
| Mean of PTP amplitude (µV) b | 0.03 | 0.29 | 0.56 |
| Mean of slope (µV/s) a | < 0.01 | 0.39 | 0.83 |
| Mean of duration (s) b | < 0.01 | 0.41 | 0.87 |
| Slow-wave index (events/min) b | 0.12 | 0.18 | 0.25 |
| Abbreviations: HRV, hear rate variability; SDNN, standard deviation of normal-to-normal (NN) intervals; RMSSD, root mean square of successive differences; pNN50, the proportion of adjacent NN intervals that differ from each other by more than 50 ms (NN50) divided by the number of NNs; nLF, normalized low frequency; nHF, normalized high frequency; PTP, peak-to-peak; Slope, slope between negative peak and mid-crossing. | | | | |

Table S3. Post-Hoc Effect Size and Statistical Power for Pressure-Category Comparisons in the Young Group (*N*=20)

| Variable | *p* value | Cohen’s f | Statistical power |
| --- | --- | --- | --- |
| Sleep disorder indices b |  |  |  |
| Arousal events | 0.07 | 0.22 | 0.36 |
| Apnea events | 0.69 | < 0.01 | < 0.1 |
| Hypopneic events | 0.40 | < 0.01 | < 0.1 |
| HRV features b |  |  |  |
| Time domain |  |  |  |
| SDNN (ms) | < 0.01 | 0.19 | 0.99 |
| RMSSD (ms) | < 0.01 | 0.17 | 0.99 |
| pNN50 (%) | < 0.01 | 0.19 | 0.99 |
| Frequency domain |  |  |  |
| nLF (%) | < 0.01 | 0.09 | 0.92 |
| nHF (%) | < 0.01 | 0.09 | 0.92 |
| LF/HF | < 0.01 | 0.09 | 0.92 |
| Slow-wave characteristics |  |  |  |
| Mean of PTP amplitude (µV) b | 0.01 | 0.40 | 0.80 |
| Mean of slope (µV/s) a | 0.32 | 0.07 | 0.07 |
| Mean of duration (s) b | 0.54 | < 0.01 | < 0.1 |
| Slow-wave index (events/min) b | 0.63 | < 0.01 | < 0.1 |
| Abbreviations: HRV, hear rate variability; SDNN, standard deviation of normal-to-normal (NN) intervals; RMSSD, root mean square of successive differences; pNN50, the proportion of adjacent NN intervals that differ from each other by more than 50 ms (NN50) divided by the number of NNs; nLF, normalized low frequency; nHF, normalized high frequency; PTP, peak-to-peak; Slope, slope between negative peak and mid-crossing. | | | | |

Table S4 presents comparisons of sleep disorder indices, HRV features, and slow-wave characteristics between initial and optimal titration pressure levels of CPAP in the elderly group (*N*=20). The mean optimal pressure (9.82 ± 3.66 cmH2O) was significantly higher than the mean initial pressure (4.10 ± 0.45 cmH2O, *p* < 0.01). A significant increase in arousal events was observed under the optimal pressure (2.70 ± 3.01 vs. 0.50 ± 1.19, *p* < 0.01). Regarding HRV features, significant differences were found in frequency-domain variables between the optimal and initial pressure (all *p* < 0.05), whereas no significant differences were noted in time-domain variables. Additionally, older participants showed a significantly reduced PTP amplitude (95.99 ± 50.98 µV) and slow-wave index (0.95 ± 1.48 events/min) at the optimal pressure compared to the initial pressure (124.48 ± 41.04 µV; 1.69 ± 1.57 events/min, both *p* < 0.05). Accordingly, in older individuals, the titration pressure identified as optimal for controlling respiratory events may coincide with changes in arousal frequency, autonomic regulation, and slow-wave activity.

**Table S4. Comparisons between 10 Min after Pressure Setting under the Initial and Optimal Titration Pressures among Elderly** **Individuals (*N*=20)**

| Variable | Initial pressure | Optimal pressure |
| --- | --- | --- |
| CPAP pressure (cmH2O) b | 4.10 ± 0.45** | 9.82 ± 3.66** |
| Sleep disorder indices b |  |  |
| Arousal events | 0.50 ± 1.19** | 2.70 ± 3.01** |
| Apnea events | - | - |
| Hypopneic events | 0.15 ± 0.37 | 0.10 ± 0.31 |
| HRV features b |  |  |
| Time domain |  |  |
| SDNN (ms) | 62.45 ± 48.72 | 61.28 ± 46.21 |
| RMSSD (ms) | 84.49 ± 69.92 | 80.78 ± 67.62 |
| pNN50 (%) | 22.92 ± 21.39 | 26.17 ± 25.78 |
| Frequency domain |  |  |
| nLF (%) | 34.00 ± 19.12* | 36.94 ± 20.07* |
| nHF (%) | 66.00 ±19.12* | 63.06 ± 20.07* |
| LF/HF | 0.77 ± 1.09* | 0.94 ± 1.35* |
| Slow-wave characteristics |  |  |
| Mean of PTP amplitude (µV) b | 124.48 ± 41.04* | 95.99 ± 50.98* |
| Mean of slope (µV/s) a | 423.76 ± 158.02 | 336.65 ± 214.82 |
| Mean of duration (s) b | 1.18 ± 0.3 | 1.13 ± 0.55 |
| Slow-wave index (events/min) b | 1.69 ± 1.57* | 0.95 ± 1.48* |
| Abbreviations: HRV, hear rate variability; SDNN, standard deviation of normal-to-normal (NN) intervals; RMSSD, root mean square of successive differences; pNN50, the proportion of adjacent NN intervals that differ from each other by more than 50 ms (NN50) divided by the number of NNs; nLF, normalized low frequency; nHF, normalized high frequency; PTP, peak-to-peak; Slope, slope between negative peak and mid-crossing.  Data are expressed as the mean ± standard deviation.  a Differences between groups were assessed using Student’s *t*-test for normally distributed data.  b Differences between groups were assessed using the Mann-Whitney *U*-test for non-normally distributed data.  * *p* < 0.05, ** *p* < 0.01. | | |

Table S5 summarizes multiple linear regression analyses examining associations between pressure categories and physiological responses in the elderly group (*N*=20), with adjustment for prior pressure changes and sleep-stage durations. Compared to the 4–5 cmH2O reference category, higher pressure groups were not significantly associated with changes in arousal events after adjustment. Conversely, strong associations were observed for heart rate variability (HRV) features, with both 6–7 cmH2O and ≥ 8 cmH2O pressure categories showing significantly higher time-domain HRV indices (SDNN, RMSSD, and pNN50; all *p* < 0.01) and concurrent shifts in frequency-domain measures, characterized by a lower nLF, higher nHF, and reduced LF/HF ratio, relative to the reference group. Regarding slow-wave characteristics, a prolonged slow-wave duration was associated with pressures of 6–7 cmH2O and ≥ 8 cmH2O (both *p* < 0.01), whereas associations with the peak-to-peak (PTP) amplitude, slope, and slow-wave index did not reach statistical significance after adjustment. Collectively, these findings suggest that after accounting for the sleep-stage distribution and pressure adjustment history, relatively high pressures for CPAP in elderly individuals were primarily associated with alterations in autonomic regulation and slow-wave temporal features, rather than with the respiratory event frequency.

**Table 5. Multiple Linear Regression Analysis of** **Incremental CPAP Pressure Categories** **with Sleep Disorder Indices, HRV Features, and Slow-Wave Characteristics among Elderly Individuals (*N*=20)**

| Variable | Beta coefficient (95% CI) | |
| --- | --- | --- |
| 6–7 cmH2O | ≥ 8 cmH2O |
| Sleep disorder indices |  |  |
| Arousal events | -0.21 (-2.24, 1.81) | -1.67 (-4.99, 1.65) |
| Apnea events | -0.40 (-1.04, 0.24) | -0.60 (-1.64, 0.45) |
| Hypopnea events | 1.01 (-0.94, 2.96) | 1.36 (-1.83, 4.56) |
| HRV features |  |  |
| Time domain |  |  |
| SDNN (ms) | 54.72 (49.40, 60.04) ** | 103.20 (94.62, 111.78) ** |
| RMSSD (ms) | 82.06 (74.61, 89.50) ** | 159.25 (147.25, 171.25) ** |
| pNN50 (%) | 20.74 (18.12, 23.37) ** | 35.68 (31.44, 39.91) ** |
| Frequency domain |  |  |
| nLF (%) | -5.74 (-8.16, -3.31) ** | -18.04 (-21.94, -14.14) ** |
| nHF (%) | 5.74 (3.31, 8.16) ** | 18.04 (14.14, 21.94) ** |
| LF/HF | -0.23 (-0.42, -0.04) * | -1.03 (-1.33, -0.72) ** |
| Slow-wave characteristics |  |  |
| Mean of PTP amplitude (µV) | 10.08 (-5.48, 25.65) | 22.00 (-3.83, 47.82) |
| Mean of slope (µV/s) | -57.74 (-148.92, 33.43) | -134.84 (-286.09, 16.42) |
| Mean of duration (s) | 0.30 (0.15, 0.44) ** | 0.56 (0.32, 0.81) ** |
| Slow-wave index (events/min) | -0.32 (-1.16, 0.51) | 0.41 (-0.97, 1.80) |
| Abbreviations: CPAP, continuous positive airway pressure; HRV, hear rate variability; CI, confidence interval; SDNN, standard deviation of normal-to-normal (NN) intervals; RMSSD, root mean square of successive differences; pNN50, the proportion of adjacent NN intervals that differ from each other by more than 50 ms (NN50) divided by the number of NNs; nLF, normalized low frequency; nHF, normalized high frequency; PTP, peak-to-peak; Slope, slope between negative peak and mid-crossing.  Note: Regression models used pressures of 4–5 cmH2O as the reference category.  Note: Multiple linear regression models were adjusted for the number of prior pressure changes and sleep-stage durations (Wake, rapid eye movement, and non- rapid eye movement) within each 10-min analysis window.  Note: Data were extracted from the 10-min window following each pressure change.  * *p* < 0.05; ** *p* < 0.01. | | |
